# Supplementary material
Source: publisher site journal article supplement (https://www.dovepress.com/get_supplementary_file.php?f=338593.docx)
Supplement: Supplementary file 1 [file get_supplementary_file.php]

**Table S1** CharacteristicsofNew ST Types *C. perfringens* Isolates Deposited in MLST Database

| **Id** | **Isolate** | **Year** | **Source** | **ST** |
| --- | --- | --- | --- | --- |
| 444 | HNlab68 | 2019 | clinical | 338 |
| 445 | HNlab70 | 2019 | clinical | 339 |
| 446 | HNlab72 | 2019 | clinical | 340 |
| 447 | HNlab73 | 2019 | clinical | 341 |
| 448 | HNlab75 | 2019 | clinical | 342 |
| 449 | HNlab76 | 2019 | clinical | 343 |
| 450 | HNlab77 | 2019 | clinical | 344 |
| 451 | HNlab81 | 2019 | clinical | 345 |
| 452 | HNlab84 | 2019 | clinical | 346 |
| 453 | HNlab87 | 2019 | clinical | 347 |
| 454 | HNlab90 | 2019 | clinical | 348 |
| 455 | HNlab94 | 2019 | clinical | 349 |
| 456 | HNlab95 | 2019 | clinical | 350 |
| 457 | HNlab96 | 2019 | clinical | 351 |
| 458 | HNlab97 | 2019 | clinical | 352 |
| 459 | HNlab99 | 2018 | clinical | 353 |
| 460 | HNlab100 | 2018 | clinical | 354 |
| 461 | HNlab102 | 2018 | clinical | 333 |
| 462 | HNlab105 | 2018 | clinical | 355 |
| 463 | HNlab107 | 2018 | clinical | 356 |
| 464 | HNlab112 | 2018 | clinical | 357 |
| 465 | HNlab113 | 2018 | clinical | 358 |
| 466 | HNlab114 | 2018 | clinical | 359 |
| 467 | HNlab117 | 2018 | clinical | 360 |
| 468 | HNlab119 | 2019 | clinical | 361 |
| 469 | HNlab120 | 2019 | clinical | 362 |
| 470 | HNlab121 | 2019 | clinical | 363 |
| 471 | HNlab123 | 2019 | clinical | 364 |
| 472 | HNlab125 | 2019 | clinical | 365 |
| 473 | HNlab126 | 2019 | clinical | 366 |
| 474 | HNlab132 | 2019 | clinical | 367 |
| 475 | HNlab134 | 2019 | clinical | 368 |
| 476 | HNlab137 | 2019 | clinical | 353 |
| 477 | HNlab138 | 2019 | clinical | 370 |
| 478 | HNlab139 | 2019 | clinical | 371 |
| 479 | HNlab140 | 2019 | clinical | 372 |
| 480 | HNlab142 | 2019 | clinical | 326 |
| 481 | HNlab143 | 2019 | clinical | 373 |
| 482 | HNlab144 | 2019 | clinical | 374 |

**Table S1** CharacteristicsofNew ST Types *C. perfringens* Isolates Deposited in MLST Database (continued)

| **Id** | **Isolate** | **Year** | **Source** | **ST** |
| --- | --- | --- | --- | --- |
| 483 | HNlab146 | 2018 | clinical | 375 |
| 484 | HNlab148 | 2019 | clinical | 376 |
| 485 | HNlab151 | 2019 | clinical | 377 |
| 486 | HNlab152 | 2019 | clinical | 378 |
| 487 | HNlab154 | 2019 | clinical | 379 |
| 488 | HNlab2 | 2019 | clinical | 369 |
| 489 | HNlab4 | 2019 | clinical | 380 |
| 490 | HNlab7 | 2019 | clinical | 381 |
| 491 | HNlab8 | 2019 | clinical | 382 |
| 492 | HNlab11 | 2019 | clinical | 383 |
| 493 | HNlab15 | 2019 | clinical | 385 |
| 494 | HNlab16 | 2019 | clinical | 386 |
| 495 | HNlab17 | 2019 | clinical | 387 |
| 496 | HNlab18 | 2019 | clinical | 388 |
| 497 | HNlab22 | 2019 | clinical | 389 |
| 498 | HNlab24 | 2019 | clinical | 390 |
| 499 | HNlab25 | 2019 | clinical | 391 |
| 500 | HNlab26 | 2019 | clinical | 392 |
| 501 | HNlab28 | 2019 | clinical | 310 |
| 502 | HNlab32 | 2019 | clinical | 311 |
| 503 | HNlab33 | 2019 | clinical | 313 |
| 504 | HNlab38 | 2019 | clinical | 314 |
| 505 | HNlab39 | 2019 | clinical | 315 |
| 506 | HNlab42 | 2018 | clinical | 316 |
| 507 | HNlab43 | 2018 | clinical | 318 |
| 508 | HNlab45 | 2019 | clinical | 320 |
| 509 | HNlab46 | 2019 | clinical | 321 |
| 510 | HNlab47 | 2019 | clinical | 322 |
| 511 | HNlab48 | 2019 | clinical | 323 |
| 512 | HNlab49 | 2019 | clinical | 324 |
| 513 | HNlab50 | 2019 | clinical | 326 |
| 514 | HNlab54 | 2019 | clinical | 328 |
| 515 | HNlab55 | 2019 | clinical | 329 |
| 516 | HNlab56 | 2019 | clinical | 330 |
| 517 | HNlab57 | 2019 | clinical | 331 |
| 518 | HNlab58 | 2019 | clinical | 332 |
| 519 | HNlab59 | 2019 | clinical | 333 |

**Table S1** CharacteristicsofNew ST Types *C. perfringens* Isolates Deposited in MLST Database(continued)

| **Id** | **Isolate** | **Year** | **Source** | **ST** |
| --- | --- | --- | --- | --- |
| 520 | HNlab60 | 2019 | clinical | 334 |
| 521 | HNlab61 | 2019 | clinical | 335 |
| 522 | HNlab64 | 2019 | clinical | 336 |
| 523 | HNlab65 | 2019 | clinical | 337 |
| 524 | HNlab14 | 2019 | clinical | 384 |
| 525 | HNlab27 | 2019 | clinical | 393 |
| 526 | HNlab67 | 2019 | clinical | 394 |
| 527 | HNlab30 | 2019 | clinical | 395 |
| 528 | HNlab36 | 2019 | clinical | 396 |
| 529 | HNlab62 | 2019 | clinical | 397 |
| 530 | HNlab71 | 2019 | clinical | 398 |
| 531 | HNlab101 | 2018 | clinical | 399 |
| 532 | HNlab136 | 2019 | clinical | 400 |
| 533 | HNlab150 | 2019 | clinical | 401 |

**Table S2** Sequence Type (ST) and Toxin Gene Profiles of *C. perfringens* Type A Isolates

| **ST (no. of isolates)** | **Allelic profile** | **Toxin types** | **Toxin genes** | | | |
| --- | --- | --- | --- | --- | --- | --- |
| ***cpa*** | ***cpb*** | ***cpe*** | ***cpb2*** |
| ST72 (4) | 4-29-19-43-1-5-4-1 | A | + | - | - | - |
| ST335 (4) | 66-3-1-50-1-41-4-1 | A | + | - | - | - |
| ST326 (2) | 4-19-1-4-3-5-1-1 | A | + | - | - | - |
| ST353 (2) | 4-77-1-11-1-5-4-1 | A | + | - | - | - |
| ST388 (2) | 71-63-1-109-25-45-48-61 | A | + | - | - | - |
| ST143 (1) | 19-5-1-5-1-2-3-1 | A | + | - | - | - |
| ST179 (1) | 4-19-1-4-3-2-1-1 | A | + | - | - | - |
| ST329 (1) | 115-14-9-11-38-4-8-11 | A | + | - | - | - |
| ST333 (1) | 66-3-1-50-1-7-4-1 | A | + | - | - | - |
| ST337 (1) | 101-69-79-96-3-2-1-1 | A | + | - | - | - |
| ST339 (1) | 1-93-89-9-25-12-4-51 | A | + | - | - | - |
| ST342 (1) | 120-99-4-54-38-4-51-89 | A | + | - | - | - |
| ST344 (1) | 19-3-79-5-66-2-3-1 | A | + | - | - | - |
| ST345 (1) | 4-5-1-3-51-4-3-1 | A | + | - | - | - |
| ST348 (1) | 3-5-1-3-56-2-39-72 | A | + | - | - | - |
| ST350 (1) | 66-58-1-3-1-41-3-1 | A | + | - | - | - |
| ST355 (1) | 85-29-102-4-49-63-46-3 | A | + | - | - | - |
| ST356 (1) | 3-29-3-7-3-5-20-1 | A | + | - | - | - |
| ST357 (1) | 3-1-63-110-3-64-1-4 | A | + | - | - | - |
| ST358 (1) | 3-5-3-110-3-2-49-52 | A | + | - | - | - |
| ST359 (1) | 121-98-105-111-67-65-52-109 | A | + | - | - | - |
| ST363 (1) | 3-19-90-5-3-5-20-1 | A | + | - | - | - |
| ST366 (1) | 124-93-89-117-3-12-4-100 | A | + | - | - | - |
| ST376 (1) | 71-3-1-109-25-7-4-1 | A | + | - | - | - |
| ST380 (1) | 3-19-1-5-3-5-3-1 | A | + | - | - | - |
| ST381 (1)） | 26-22-46-27-59-18-1-28 | A | + | - | - | - |
| ST384 (1) | 110-3-3-124-56-2-1-72 | A | + | - | - | - |
| ST386 (1) | 4-58-1-46-1-2-8-1 | A | + | - | - | - |
| ST389 (1) | 4-5-1-5-4-4-3-1 | A | + | - | - | - |
| ST391 (1) | 4-19-5-4-3-71-20-1 | A | + | - | - | - |
| ST392 (1) | 109-72-23-34-38-61-41-105 | A | + | - | - | - |
| ST398 (1) | 118-16-112-132-38-4-8-52 | A | + | - | - | - |
